# Supplementary material for: Cognitive Profile and Relationship with Quality of Life and Psychosocial Functioning in Mood Disorders
Source: Oxford University Press journal article supplement (doi:10.1093/arclin/acab054), 2021-06-21
Supplement: 20210224_supplementar_table_1_acab054.docx [file 20210224_supplementar_table_1_acab054.docx]

Supplementary Table 1.

*Overarching model with all sample data evaluating the interaction between mood disorder groups and significant confounders on composite cognitive score*

|  |  | **Summary measures**  **Mean (SD); n** | **b** | **Chi-square (df)** | **p-value** |
| --- | --- | --- | --- | --- | --- |
| Educational level1 |  |  | Educational level *X* Mood disorder  𝜒2 (df) = 2.1 (4) | | 0.717 |
| BD | Primary level | 84.5 (±8.4); 4 | Reference |  |  |
|  | Secondary level | 92.6 (±5.4); 11 | -1.5 (-11.7, 12.9) | 0.09 (1) | 0.769 |
|  | University level | 96.0 (±6.9); 17 | 0.0 (-9.2, 9.3) | 0.00 (1) | 0.988 |
| MDD | Primary level | 84.4 (±4.3); 4 | Reference |  |  |
|  | Secondary level | 93.3 (±5.9); 15 | -0.7 (-10.8, 9.4) | 0.02 (1) | 0.895 |
|  | University level | 99.3 (±2.4); 11 | 3.5 (-5.9, 12.9) | 0.53 (1) | 0.469 |
| Control | Primary level | 88.6 (±3.7); 2 | Reference |  |  |
|  | Secondary level | 98.2 (±4.0); 5 | Reference |  |  |
|  | University level | 100.0 (±4.5); 21 | Reference |  |  |
| Gender2 |  |  | Gender *X* Mood disorder  𝜒2 (df)= 4.9 (2) | | 0.085 |
| BD | Male | 99.5 (±5.2); 6 | Reference |  |  |
|  | Female | 92.1 (±7.4); 26 | -0.1 (-0.4, 0.1) | 4.93 (1) | 0.026 |
| MDD | Male | 96.9 (±4.3); 6 | Reference |  |  |
|  | Female | 93.7 (±7.0); 24 | 3.4 (-3.2, 10.0) | 1.04 (1) | 0.148 |
| Control | Male | 97.5 (±5.2); 10 | Reference |  |  |
|  | Female | 99.7 (±5.1); 18 | Reference |  |  |
| Age |  |  |  | Age *X* Mood disorder  𝜒2 (df)= 2.5 (2) | 0.290 |
| BD |  | 93.4 (±7.4); 32 | 0.1 (-0.2, 0.3) | 1.35 (1) | 0.245 |
| MDD |  | 94.3 (±6.6); 30 | -0.1 (-0.4, 0.1) | 0.17 (1) | 0.676 |
| Control |  | 98.9 (±5.2); 28 | Reference |  |  |
| WHOQoL‡ |  |  | WHOQoL *X* Mood disorder  𝜒2 (df)= 3.58 (2) | | 0.167 |
| BD |  | 93.4 (±7.4); 32 | 0.2 (-0.1, 0.6) | 1.95 (1) | 0.163 |
| MDD |  | 94.3 (±6.6); 30 | 0.6 (-0.3, 0.4) | 0.11 (1) | 0.737 |
| Control |  | 98.9 (±5.2); 28 | Reference |  |  |
| SDS† |  |  | SDS *X* Mood disorder  𝜒2 (df)= 0.99 (2) | | 0.290 |
| BD |  | 93.4 (±7.4); 32 | 0.1 (-0.2, 0.5) | 0.56 (1) | 0.954 |
| MDD |  | 94.3 (±6.6); 30 | 0.0 (-0.4, 0.4) | 0.03 (1) | 0.440 |
| Control |  | 98.9 (±5.2); 28 | Reference |  |  |

*Note.* 1 Control group and Primary level (education background) were the reference groups; 2 Control group and male were the reference groups.

†Sheehan Disability Scale (SDS) (Composite of three domains); ‡WHOQoL (Brief World Health Organization Quality-of-Life Scale) total score.
