# Supplementary material for: Cognitive Profile and Relationship with Quality of Life and Psychosocial Functioning in Mood Disorders
Source: Oxford University Press journal article supplement (doi:10.1093/arclin/acab054), 2021-06-21
Supplement: 20210224_supplementar_table_2_acab054.docx [file 20210224_supplementar_table_2_acab054.docx]

Supplementary Table 2.

*Effects of the interaction between mood disorder groups and medications used on composite cognitive score*

|  |  | **Summary measures**  **Mean (SD); n** | **b** | **Chi-square (df)** | **p-value** |
| --- | --- | --- | --- | --- | --- |
| Antidepressants1 |  |  | Antidepressants *X* Mood disorder  𝜒2 (df)=1.96 (2) | | 0.376 |
| BD | Yes | 91.8 (±8.5); 14 | -4.5 (-12.5, 3.6) | 1.18 (1) | 0.911 |
|  | No | 94.6 (±6.4); 18 | Reference |  |  |
| MDD | Yes | 94.9 (±6.0); 17 | -0.5 (-8.6, 7.7) | 0.01 (1) | 0.277 |
|  | No | 93.7 (±7.6); 13 | Reference |  |  |
| Control | Yes | 100.3 (±2.5); 4 | Reference |  |  |
|  | No | 98.7 (±5.5); 24 | Reference |  |  |
| Atypical antipsychotics2 |  |  | Antipsychotics *X* Mood disorder  𝜒2 (df)=2.21 (1) | | 0.137 |
| BD | Yes | 89.2 (±7.2); 12 | Reference |  |  |
|  | No | 95.9 (±6.5); 20 | Reference |  |  |
| MDD | Yes | 93.7 (±5.5); 4 | 5.9 (-1.9, 13.7) | 2.21 (1) | 0.137 |
|  | No | 94.4 (±6.9); 26 | Reference |  |  |
| Control | Yes | - | - |  |  |
|  | No | 98.9 (±5.2); 28 | Reference |  |  |
| Lithium3 |  |  | Lithium *X* Mood disorder  𝜒2 (df)=2.21 (1) | | 0.332 |
| BD | Yes | 94.8 (±6.2); 13 | Reference |  |  |
|  | No | 92.5 (±8.2); 19 | Reference |  |  |
| MDD | Yes | 103.0; 1 | 6.6 (-6.7, 20.0) | 0.94 (1) | 0.332 |
|  | No | 94.0 (±6.5); 29 | Reference |  |  |
| Control | Yes | - | - |  |  |
|  | No | 98.9 (±5.2); 28 | Reference |  |  |
| Other Mood Stabilizer4 |  |  | Mood Stabilizer *X* Mood disorder  𝜒2 (df)=0.57 (1) | | 0.450 |
| BD | Yes | 91.9 (±7.4); 18 | Reference |  |  |
|  | No | 95.3 (±7.2); 14 | Reference |  |  |
| MDD | Yes | 94.3 (±7.3); 3 | 3.4 (-5.4, 12.1) | 0.57 (1) | 0.450 |
|  | No | 94.3 (±6.7); 27 | Reference |  |  |
| Control | Yes | - | - |  |  |
|  | No | 98.9 (±5.2); 28 | Reference |  |  |

Note. 1 Control group and No (antidepressants) were the reference groups; 2 MDD group and No (Atypical antipsychotics) were the reference groups; 3 MDD group and No (Lithium) were the reference groups; 4 MDD group and No (Other Mood Stabilizer) were the reference groups.
